# Supplementary material for: Evidence from the resurrected family Polyrhabdinidae Kamm, 1922 (Apicomplexa: Gregarinomorpha) supports the epimerite, an attachment organelle, as a major eugregarine innovation
Source: PeerJ journal article supplement (doi:10.7717/peerj.11912), 2021-09-16
Supplement: SFigure_2.pdf [file SFigure_2.pdf]

# Ancoroidea

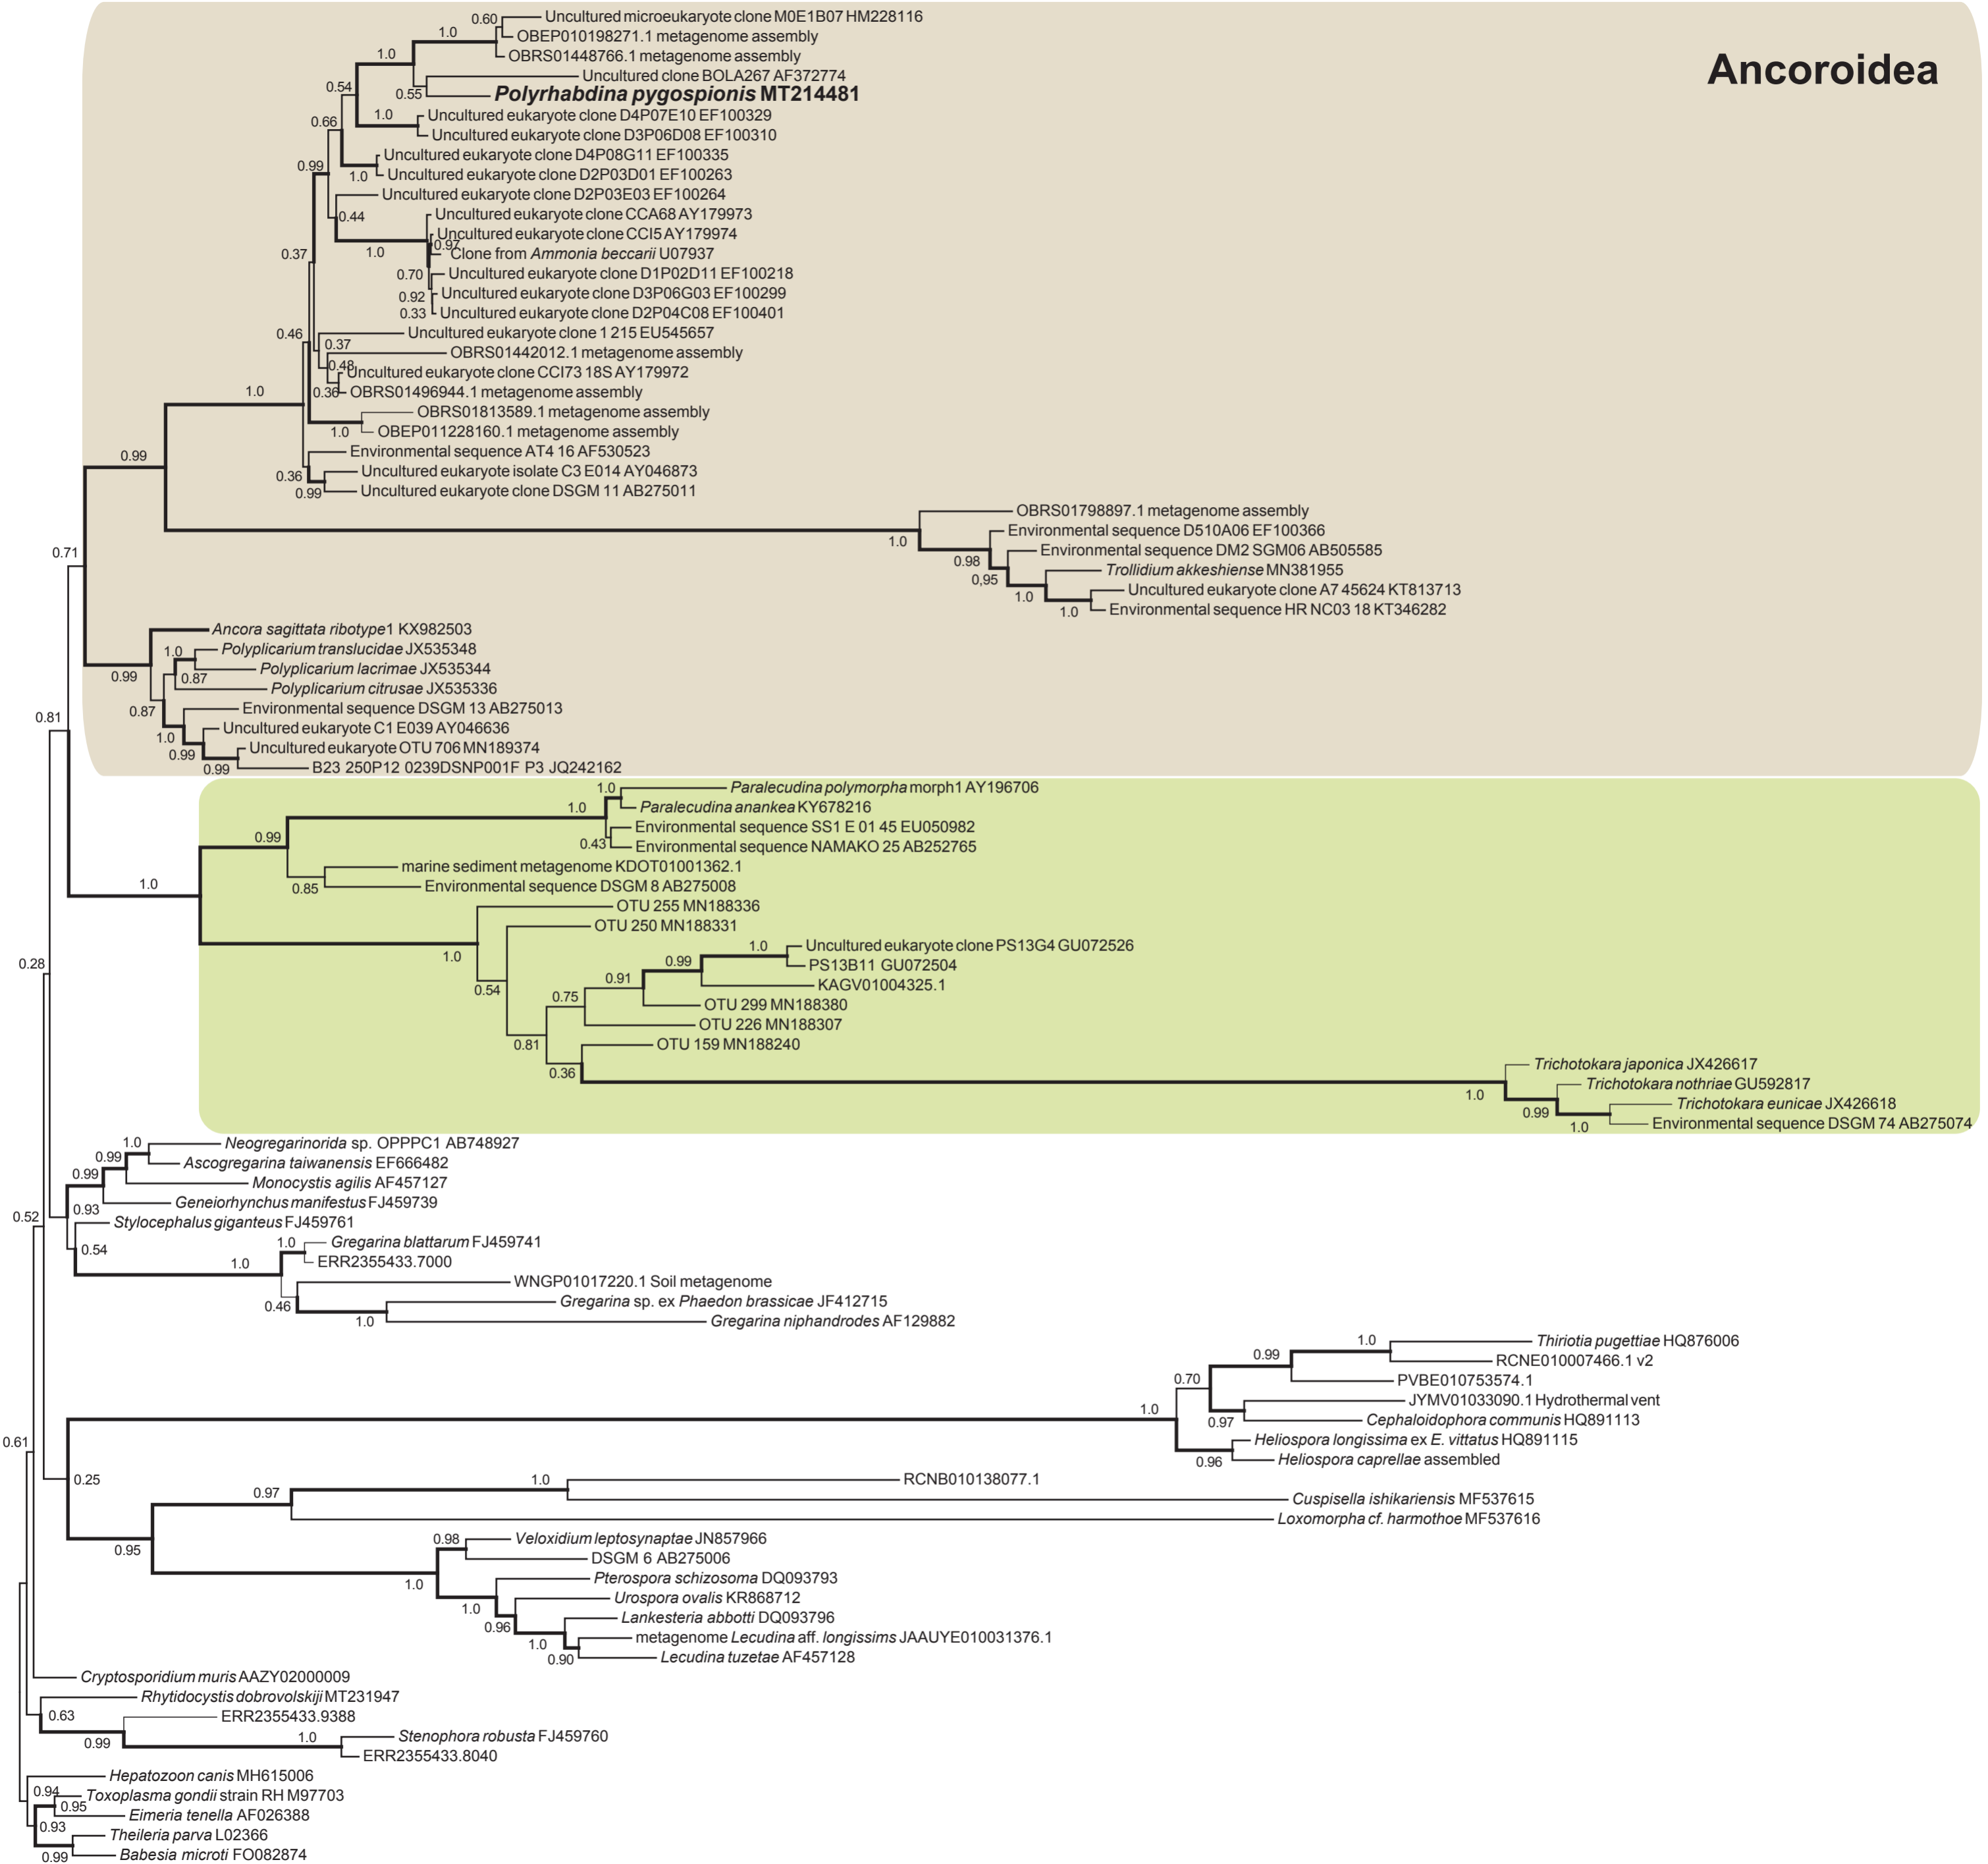

0.10
