# Supplementary material for: Evidence from the resurrected family Polyrhabdinidae Kamm, 1922 (Apicomplexa: Gregarinomorpha) supports the epimerite, an attachment organelle, as a major eugregarine innovation
Source: PeerJ journal article supplement (doi:10.7717/peerj.11912), 2021-09-16

FULL

1471

1366

1257

1126

1087

828

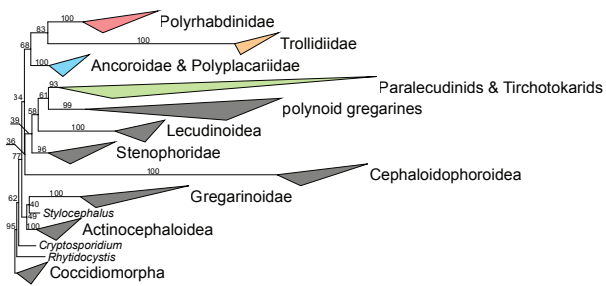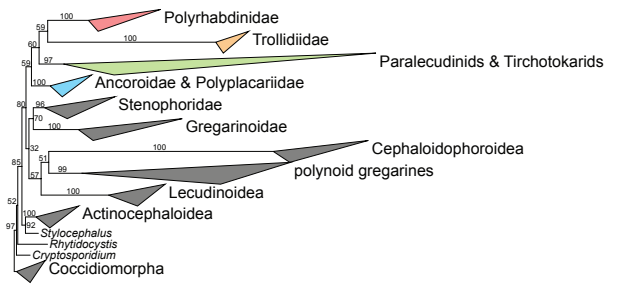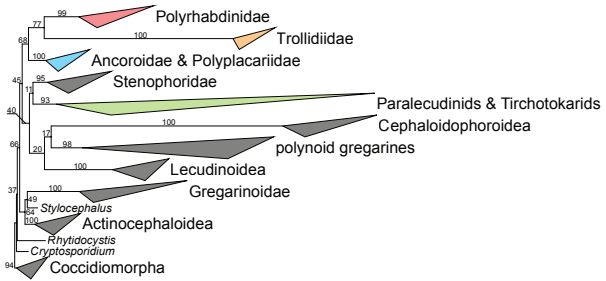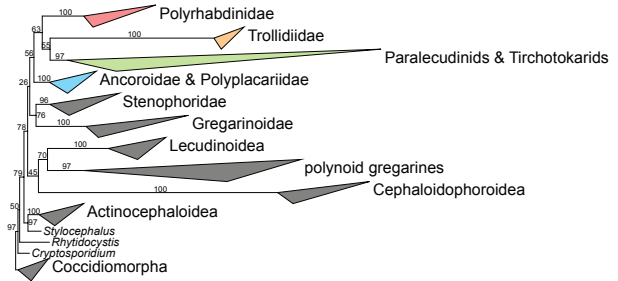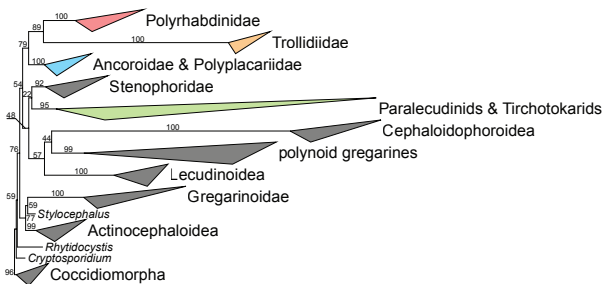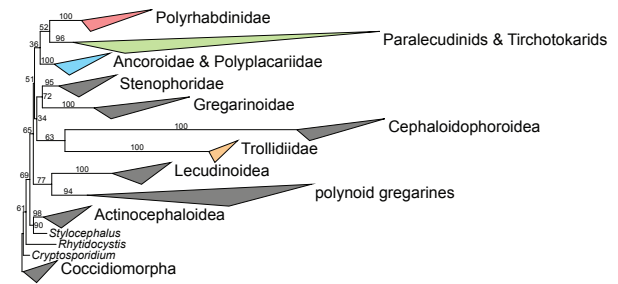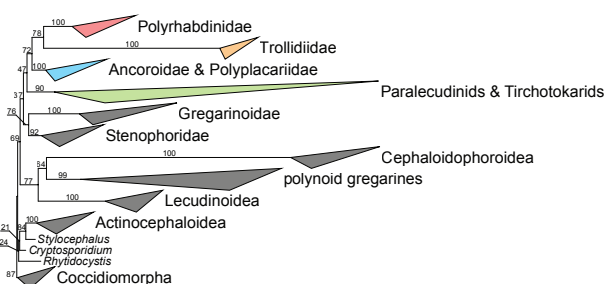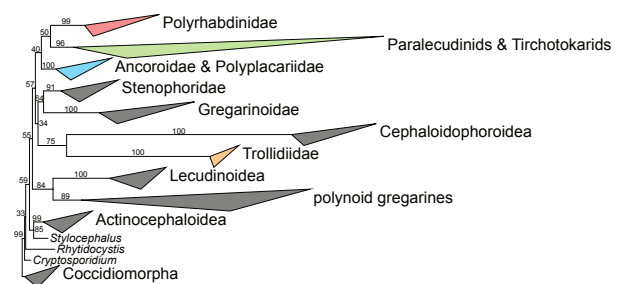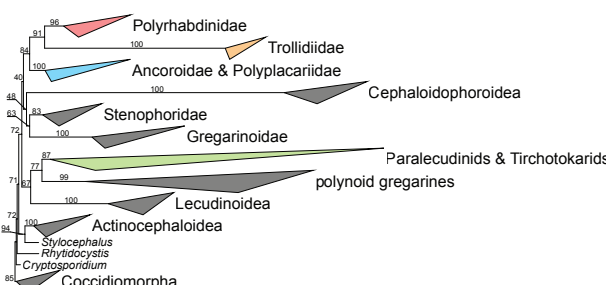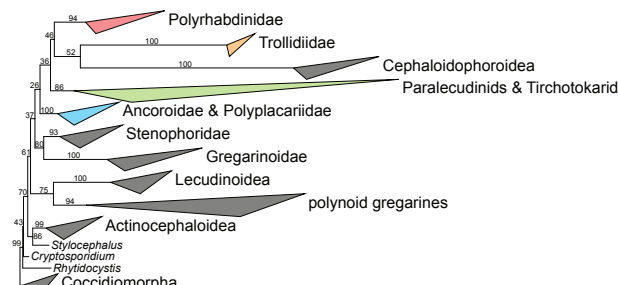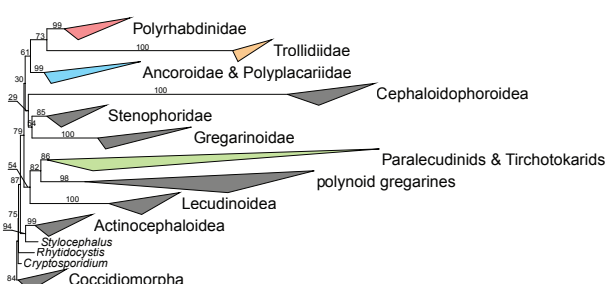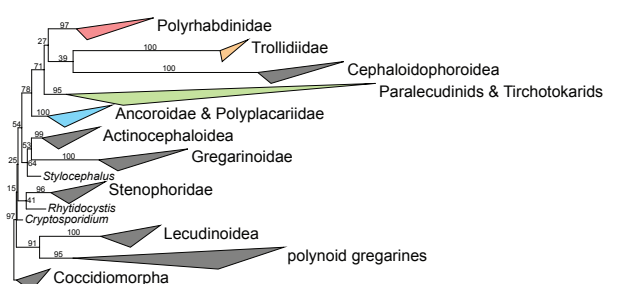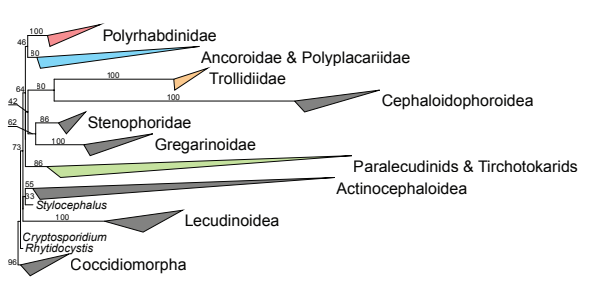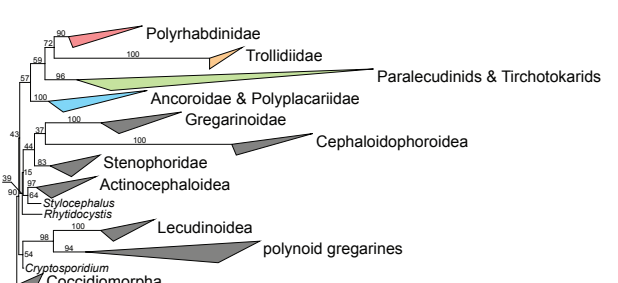

Supplement: SFigure_3.pdf [file SFigure_3.pdf]
