# Supplementary material for: Evidence from the resurrected family Polyrhabdinidae Kamm, 1922 (Apicomplexa: Gregarinomorpha) supports the epimerite, an attachment organelle, as a major eugregarine innovation
Source: PeerJ. 2021 Sep 16;9:e11912. doi: 10.7717/peerj.11912 (PMC8450007; doi:10.7717/peerj.11912)
Supplement: Supplemental Information 11 [file peerj-09-11912-s011.xlsx]

## Sheet: P. pygospionis
Resin blocks and fixed slides containing eugregarines and pieces of infected host intestine deposited in the collection of the Department of Invertebrate Zoology, St Petersburg State University (accession numbers 3-6, 622-623, 678-680, 734, 786, 794-795, 862, 879 in the section “Polyrhabdina pygospionis”).
Squash preparations
Info about photo	NN	Length, mkm	Width, in the middle cell, mkm	diameter of nucleus, logitudinally, mkm	diameter of nucleus, transversally, mkm	Number of nucleoli	diameter of nucleolus # 1, mkm	diameter of nucleolus in large gamonts, mkm	diameter of nucleolus # 2, mkm	diameter of nucleolus # 3, mkm	diameter of nucleolus # 4, mkm	Epimerite, length, mkm	Epimerite, width, at the base,mkm	Gamonts, small <90 mkm
1	39.8305	33.0508											small
2	38.1356	33.0508	14.4068	13.5593									small
3	40.678	35.5932	14.4068	14.4068									small
4	99.1525	26.2712	12.7119	11.8644	1	6.77966	6.77966						large
5	50.8475	31.3559	16.9492	16.9492	2	5.9322		5.08475			3.38983	3.81356	small
6	62.7119	22.8814	16.9492	12.7119	3	4.23729		4.23729	3.38983				small
7	50.8475	44.9153	16.9492	15.2542	2	5.9322		5.08475					small
8	61.0169	33.8983	16.9492	14.4068	2	6.77966		5.9322					small
9	77.9661	26.2712	16.9492	15.2542	2	5.9322		5.08475					small
10	116.102	24.5763	14.4068	14.4068	1	8.47458	8.47458						large
11	108.475	24.5763	14.4068	13.5593	1	6.77966	6.77966						large
12	107.627	22.8814	13.5593	11.8644	1	6.77966	6.77966						large
13	118.644	23.7288	14.4068	14.4068	1	6.77966	6.77966						large
14	65.2542	18.6441	11.4407	11.8644	1	5.9322							small
15	70.339	24.5763	16.9492	15.2542	2	6.77966		4.23729					small
16	28.8136	16.9492	9.49153	9.49153	2	3.72881		2.71186					small
17	42.3729	25.4237	13.5593	13.5593	1	6.44068							small
18	45.0847	31.8644	18.9831	15.2542	4	4.74576		4.40678	4.40678	3.38983			small
19	58.3051	28.8136	14.5763	13.5593	2	6.44068		5.42373					small
20	51.5254	21.0169	12.8814	15.9322	2	7.11864		2.71186					small
						all	large gamonts						Small gamonts
Average	66.6864	27.5169	14.7859	13.8715	1.76471	6.21137	7.11864	4.49153	3.89831	3.38983	3.38983	3.81356	4.31551
Min	28.8136	16.9492	9.49153	9.49153	1	3.72881	6.77966	2.71186	3.38983	3.38983	3.38983	3.81356	2.71186
Max	118.644	44.9153	18.9831	16.9492	4	8.47458	8.47458	5.9322	4.40678	3.38983	3.38983	3.81356	5.9322
SEM	23.15	5.24068	1.80807	1.34842	0.629758	0.828104	0.542373	0.830508	0.508475	0	0	0	0.802327
SD	28.3913	6.60394	2.31679	1.7562	0.83137	1.13214	0.757989	1.07864	0.719092	#DIV/0!	#DIV/0!	#DIV/0!	1.02074
n	20	20	19	19	17	17	5	10	2	1	1	1	13
Live obsevations
	Length, mkm	Width, mkm	Max diameter, nucleus, mkm	diameter nucleolus, mkm
1	185	52,5
2	168	33,6	16,8
3	78.4	32.2	11.2
4	56	22.4	8.4
5	84	30.8	16.8
6	89.6	33.6	14
7	56	25.2	11.2	4.2
8	114.8	42	8.4
9	117.6	42	11.2
10	92.4	33.6
11	95.2	36.4	11.2
12	75.6	28	11.2
13	103.6	42	11.2
14	64.4	28	5.6
15	28	14	8.4
16	204.4	42	16.8
17	145.6	42	16.8
18	106.4	33.6	16.8
19	117.6	33.6	14
20	134.4	36.4	16.8	8.4
21	78.4	39.2	14
22	134.4	39.2	14
23	145.6	39.2	15.4
24	128.8	39.2
25	154	39.2	14
26	154	39.2	14	5.6
27	89.6	28	11.2
28	117.6	28	11.2	4.2
29	117.6	30.8	16.8
30	120.4	33.6	16.8
31	131.6	33.6	16.8
32	123.2	28	14
33	126	36.4	14	7
34	123.2	33.6	11.2	2.8
35	123.2	33.6	15.4	8.4
36	168	42
37	114.8	33.6	14
38	170.8	35	16.8	4.2
39	207.2	50.4	16.8
40	288.4	42	16.8
Max	288.4	50.4	16.8	8.4
min	28	14	5.6	2.8
average	123.345	34.7789	13.52	5.6
SEM	33.634	5.14626	2.52343	1.75
SD	47.6634	6.76154	3.05487	2.1166
n	40	40	36	8
Density of crests, middle cell
	Scale value, mkm	Scale length, mm	Length of sector,mm	Number of crest in sector	Length of sector, mkm	Number of crests in 1 mkm
	1	42	150	18	3.57143	5.04
	2	29	60	19	4.13793	4.59167
	1	35	130	18	3.71429	4.84615
	1	22	150	33	6.81818	4.84
	1	38	105	15	2.76316	5.42857
					Average	4.94928
					min	4.59167
					max	5.42857
					n	5
Ectoplasm		Width, mkm
		1.65
		1.5
		0.493714
		0.438857
		0.384
		0.603429
		0.438857
		0.274286
		0.329143
		0.384
		0.713143
		0.377143
		0.685714
		0.208163
	Average	0.605746
	Min	0.208163
	Max	1.65
	SEM	0.303696
	SD	0.436013
	n	14
Amylopectin		Max diameter, mkm
		1.01157
		1.02543
		1.17786
		1.28871
		1.30257
		0.942286
		0.925714
		0.805714
		0.797143
		0.625714
		0.685714
		0.565714
		0.814286
		0.156398
		0.14455
		0.9
		0.75
		0.8
		0.8
		0.85
		1.05
		1.05
		0.75
		0.8
		0.8
		0.7
		0.85
		0.75
		0.9
		0.85
	Average	0.828979
	Min	0.14455
	Max	1.30257
	SEM	0.167896
	SD	0.252781
	n	30
Crests / pellicle	Length, nm	Width, nm	Thick of basal lamina, nm	Thick of IMC, nm	Thick of plasma membrane, nm	Thick of pellicle, nm
			23.2558	17.4419	11.6279	29.0698
			23.2558	17.4419	17.4419	34.8837
			23.2558	17.4419	17.4419	34.8837
			23.2558	20.3488	11.6279	31.9767
			23.2558	29.0698	26.1628	55.2326
	1449.28	260.87
	1391.3	231.884
	1391.3	260.87
			17.4757	15.534	15.534	31.068
	2276.57	521.143
	2413.71	356.571
	2304	411.429
	2235.87	499.783
	956.143	277.143
	942.286	304.857
	900.714	304.857
	928.429	318.714
	1136.29	277.143
	1108.57	318.714
	1150.14	304.857
	1164	304.857
	1207.5	315
	1260	304.5
	1155	252
	1228.5	325.5
Average	1399.98	323.721	22.2925	19.5464	16.6394	36.1857
Min	900.714	231.884	17.4757	15.534	11.6279	29.0698
Max	2413.71	521.143	23.2558	29.0698	26.1628	55.2326
SEM	387.319	52.1918
SD	506.148	76.9143
n	19	19	6	6	6	6
Epimerite	Length, mkm	Base diameter, mkm
	3.38983	3.81356
	4	4.5
Average	3.69492	4.15678
Min	3.38983	3.81356
Max	4	4.5
SEM	0.305085	0.34322
SD	0.431455	0.485387
n	2	2
Collar of epimerite	Collar length, mkm
	1.85806
	1.82844
	2.15111
	2.67789
	2.37474
	0.156463
	1.90476
Average	1.85021
Min	0.156463
Max	2.67789
SEM	0.490147
SD	0.808602
n	7
Gap in the epimerite base
	Depth, mkm	Width, mkm
	0.565957	0.0485106
	0.535211	0.0428169
	0.64186	0.0418605
	0.553846	0.0461538
	0.117089	0.00949367
	0.101266	0.00632911
	0.614286	0.0428571
	0.638554	0.0481928
Average	0.471009	0.0357768
Min	0.101266	0.00632911
Max	0.64186	0.0485106
SEM	0.180916	0.0139327
SD	0.226703	0.0173973
n	8	8

## Sheet: Infection rate of P.pygosp.
														Published in: Paskerova GG, Miroliubova TS, Diakin A, Kováčiková M, Valigurová A, Guillou L, Aleoshin VV, Simdyanov TG. 2018. Fine structure and Molecular Phylogenetic Position of Two Marine Gregarines, Selenidium pygospionis sp. n. and S. pherusae sp. n., with Notes on the Phylogeny of Archigregarinida. Protist 169(6): 826-852. 10.1016/j.protis.2018.06.004
Infection of host	Occurrence of parasites				Monoinfection with Polyrhabdina pygospionis			Co-infection Polyrhabdina + Selenidium						Monoinfection with Selenidium pygospionis			Occurrence of Selenidium pygospionis
NN hosts	Polyrhabdina pygospionis, 1 - yes, 0 - no	Selenidium pygospionis, 1 - yes, 0 - no	Co-infection		NN hosts	Cells per host		NN hosts	Polyrhabdina cells per host	Selenidium cells per host		n		NN hosts	cells per host		NN hosts	cells per host
1 ind.Pygospio elegans	1	0	1		1 indз.Pygospio elegans	1		3 ind.Pygospio elegans	1	9		1		20 ind.Pygospio elegans	3		3 ind.Pygospio elegans	9
2 ind.Pygospio elegans	1	0	1		2 ind.Pygospio elegans	7		8 ind.Pygospio elegans	5	20		2		25 ind.Pygospio elegans	5		8 ind.Pygospio elegans	20
3 ind.Pygospio elegans	1	1	2		4 ind.Pygospio elegans	3		9 ind.Pygospio elegans	1	8		3		30 ind.Pygospio elegans	14		9 ind.Pygospio elegans	8
4 ind.Pygospio elegans	1	0	1		5 ind.Pygospio elegans	10		10 ind.Pygospio elegans	8	9		4		31 ind.Pygospio elegans	6		10 ind.Pygospio elegans	9
5 ind.Pygospio elegans	1	0	1		6 ind.Pygospio elegans	2		11 ind.Pygospio elegans	14	2		5		38 ind.Pygospio elegans	7		11 ind.Pygospio elegans	2
6 ind.Pygospio elegans	1	0	1		7 ind.Pygospio elegans	1		12 ind.Pygospio elegans	10	38		6		40 ind.Pygospio elegans	6		12 ind.Pygospio elegans	38
7 ind.Pygospio elegans	1	0	1		16 ind.Pygospio elegans	1		13 ind.Pygospio elegans	7	10		7		47 ind.Pygospio elegans	3		13 ind.Pygospio elegans	10
8 ind.Pygospio elegans	1	1	2		26 ind.Pygospio elegans	5		17 ind.Pygospio elegans	4	1		8		62 ind.Pygospio elegans	2		17 ind.Pygospio elegans	1
9 ind.Pygospio elegans	1	1	2		29 ind.Pygospio elegans	1		18 ind.Pygospio elegans	5	6		9		75 ind.Pygospio elegans	1		18 ind.Pygospio elegans	6
10 ind.Pygospio elegans	1	1	2		34 ind.Pygospio elegans	11		19 ind.Pygospio elegans	4	1		10		116 ind.Pygospio elegans	5		19 ind.Pygospio elegans	1
11 ind.Pygospio elegans	1	1	2		35 ind.Pygospio elegans	10		27 ind.Pygospio elegans	3	2		11		128 ind.Pygospio elegans	2		20 ind.Pygospio elegans	3
12 ind.Pygospio elegans	1	1	2		36 ind.Pygospio elegans	4		28 ind.Pygospio elegans	1	9		12		138 ind.Pygospio elegans	4		25 ind.Pygospio elegans	5
13 ind.Pygospio elegans	1	1	2		37 ind.Pygospio elegans	4		41 ind.Pygospio elegans	2	1		13		152 ind.Pygospio elegans	1		27 ind.Pygospio elegans	2
14 ind.Pygospio elegans	0	0	0		43 ind.Pygospio elegans	5		60 ind.Pygospio elegans	4	2		14		154 ind.Pygospio elegans	1		28 ind.Pygospio elegans	9
15 ind.Pygospio elegans	0	0	0		44 ind.Pygospio elegans	1		69 ind.Pygospio elegans	5	1		15		161 ind.Pygospio elegans	1		30 ind.Pygospio elegans	14
16 ind.Pygospio elegans	1	0	1		54 ind.Pygospio elegans	9		70 ind.Pygospio elegans	3	1		16		164 ind.Pygospio elegans	1		31 ind.Pygospio elegans	6
17 ind.Pygospio elegans	1	1	2		57 ind.Pygospio elegans	4		92 ind.Pygospio elegans	1	6		17		171 ind.Pygospio elegans	1		38 ind.Pygospio elegans	7
18 ind.Pygospio elegans	1	1	2		61 ind.Pygospio elegans	3		110 ind.Pygospio elegans	1	1		18		175 ind.Pygospio elegans	2		40 ind.Pygospio elegans	6
19 ind.Pygospio elegans	1	1	2		65 indз.Pygospio elegans	1		123 ind.Pygospio elegans	8	9		19		176 ind.Pygospio elegans	1		41 ind.Pygospio elegans	1
20 ind.Pygospio elegans	0	1	1		68 ind.Pygospio elegans	2		129 ind.Pygospio elegans	5	1		20		181 ind.Pygospio elegans	2		47 ind.Pygospio elegans	3
21 ind.Pygospio elegans	0	0	0		72 ind.Pygospio elegans	2		130 ind.Pygospio elegans	1	3		21		186 ind.Pygospio elegans	1		60 ind.Pygospio elegans	2
22 ind.Pygospio elegans	0	0	0		73 ind.Pygospio elegans	1		132 ind.Pygospio elegans	5	1		22		187 ind.Pygospio elegans	16		62 ind.Pygospio elegans	2
23 ind.Pygospio elegans	0	0	0		79 ind.Pygospio elegans	1		147 ind.Pygospio elegans	1	5		23		196 ind.Pygospio elegans	3		69 ind.Pygospio elegans	1
24 ind.Pygospio elegans	0	0	0		85 ind.Pygospio elegans	1		201 ind.Pygospio elegans	3	7		24		198 ind.Pygospio elegans	1		70 ind.Pygospio elegans	1
25 ind.Pygospio elegans	0	1	1		88 ind.Pygospio elegans	3		203 ind.Pygospio elegans	1	50		25		207 ind.Pygospio elegans	10		75 ind.Pygospio elegans	1
26 ind.Pygospio elegans	1	0	1		89 ind.Pygospio elegans	3		204 ind.Pygospio elegans	10	150		26		208 ind.Pygospio elegans	5		92 ind.Pygospio elegans	6
27 ind.Pygospio elegans	1	1	2		91 ind.Pygospio elegans	4		205 ind.Pygospio elegans	10	50		27		209 ind.Pygospio elegans	50		110 ind.Pygospio elegans	1
28 ind.Pygospio elegans	1	1	2		93 ind.Pygospio elegans	8		206 ind.Pygospio elegans	10	50		28		214 ind.Pygospio elegans	10		116 ind.Pygospio elegans	5
29 ind.Pygospio elegans	1	0	1		95 ind.Pygospio elegans	1		210 ind.Pygospio elegans	1	10		29		215 ind.Pygospio elegans	10		123 ind.Pygospio elegans	9
30 ind.Pygospio elegans	0	1	1		99 ind.Pygospio elegans	5		211 ind.Pygospio elegans	2	2		30		216 ind.Pygospio elegans	10		128 ind.Pygospio elegans	2
31 ind.Pygospio elegans	0	1	1		100 ind.Pygospio elegans	2		212 ind.Pygospio elegans	10	10		31		225 ind.Pygospio elegans	2		129 ind.Pygospio elegans	1
32 ind.Pygospio elegans	0	0	0		101 ind.Pygospio elegans	3		213 ind.Pygospio elegans	10	10		32		236 ind.Pygospio elegans	4		130 ind.Pygospio elegans	3
33 ind.Pygospio elegans	0	0	0		103 ind.Pygospio elegans	2		218 ind.Pygospio elegans	1	10		33		241 ind.Pygospio elegans	18		132 ind.Pygospio elegans	1
34 ind.Pygospio elegans	1	0	1		108 ind.Pygospio elegans	5		244 ind.Pygospio elegans	3	6		34		247 ind.Pygospio elegans	6		138 ind.Pygospio elegans	4
35 ind.Pygospio elegans	1	0	1		115 ind.Pygospio elegans	1		252 ind.Pygospio elegans	4	5		35		248 ind.Pygospio elegans	3		147 ind.Pygospio elegans	5
36 ind.Pygospio elegans	1	0	1		119 ind.Pygospio elegans	2		253 ind.Pygospio elegans	15	2		36		251 ind.Pygospio elegans	3		152 ind.Pygospio elegans	1
37 ind.Pygospio elegans	1	0	1		124 ind.Pygospio elegans	2		254 ind.Pygospio elegans	16	9		37		258 ind.Pygospio elegans	4		154 ind.Pygospio elegans	1
38 ind.Pygospio elegans	0	1	1		126 ind.Pygospio elegans	3		255 ind.Pygospio elegans	5	8		38		259 ind.Pygospio elegans	6		161 ind.Pygospio elegans	1
39 ind.Pygospio elegans	0	0	0		127 ind.Pygospio elegans	1		257 ind.Pygospio elegans	50	2		39		261 ind.Pygospio elegans	1		164 ind.Pygospio elegans	1
40 ind.Pygospio elegans	0	1	1		131 ind.Pygospio elegans	4		260 ind.Pygospio elegans	5	3		40		264 ind.Pygospio elegans	5		171 ind.Pygospio elegans	1
41 ind.Pygospio elegans	1	1	2		133 ind.Pygospio elegans	1		262 ind.Pygospio elegans	1	5		41		265 ind.Pygospio elegans	6		175 ind.Pygospio elegans	2
42 ind.Pygospio elegans	0	0	0		134 ind.Pygospio elegans	1		266 ind.Pygospio elegans	1	3		42		269 ind.Pygospio elegans	2		176 ind.Pygospio elegans	1
43 ind.Pygospio elegans	1	0	1		137 ind.Pygospio elegans	2		268 ind.Pygospio elegans	7	6		43		272 ind.Pygospio elegans	1		181 ind.Pygospio elegans	2
44 ind.Pygospio elegans	1	0	1		139 ind.Pygospio elegans	4		271 ind.Pygospio elegans	8	2		44		Max	50		186 ind.Pygospio elegans	1
45 ind.Pygospio elegans	0	0	0		140 ind.Pygospio elegans	1		275 ind.Pygospio elegans	13	1		45		Min	1		187 ind.Pygospio elegans	16
46 ind.Pygospio elegans	0	0	0		142 ind.Pygospio elegans	1		276 ind.Pygospio elegans	7	5		46		Mode	1		196 ind.Pygospio elegans	3
47 ind.Pygospio elegans	0	1	1		144 ind.Pygospio elegans	3		277 ind.Pygospio elegans	13	14		47		Average	5.69767		198 ind.Pygospio elegans	1
48 ind.Pygospio elegans	0	0	0		146 ind.Pygospio elegans	2		279 ind.Pygospio elegans	2	15		48		n	43		201 ind.Pygospio elegans	7
49 ind.Pygospio elegans	0	0	0		150 ind.Pygospio elegans	1		285 ind.Pygospio elegans	11	3		49					203 ind.Pygospio elegans	50
50 ind.Pygospio elegans	0	0	0		151 ind.Pygospio elegans	5		286 ind.Pygospio elegans	7	4		50					204 ind.Pygospio elegans	150
51 ind.Pygospio elegans	0	0	0		153 ind.Pygospio elegans	2		287 ind.Pygospio elegans	24	4		51					205 ind.Pygospio elegans	50
52 ind.Pygospio elegans	0	0	0		156 ind.Pygospio elegans	1		288 ind.Pygospio elegans	15	2		52					206 ind.Pygospio elegans	50
53 ind.Pygospio elegans	0	0	0		240 ind.Pygospio elegans	1		289 ind.Pygospio elegans	15	100		53					207 ind.Pygospio elegans	10
54 ind.Pygospio elegans	1	0	1		256 ind.Pygospio elegans	4		290 ind.Pygospio elegans	1	9		54					208 ind.Pygospio elegans	5
55 ind.Pygospio elegans	0	0	0		273 ind.Pygospio elegans	3		291 ind.Pygospio elegans	9	4		55					209 ind.Pygospio elegans	50
56 ind.Pygospio elegans	0	0	0		274 ind.Pygospio elegans	4		292 ind.Pygospio elegans	5	9		56					210 ind.Pygospio elegans	10
57 ind.Pygospio elegans	1	0	1		278 ind.Pygospio elegans	3		293 ind.Pygospio elegans	3	4		57					211 ind.Pygospio elegans	2
58 ind.Pygospio elegans	0	0	0		280 ind.Pygospio elegans	5		294 ind.Pygospio elegans	17	7		58					212 ind.Pygospio elegans	10
59 ind.Pygospio elegans	0	0	0		282 ind.Pygospio elegans	10		295 ind.Pygospio elegans	18	13		59					213 ind.Pygospio elegans	10
60 ind.Pygospio elegans	1	1	2		284 ind.Pygospio elegans	5		296 ind.Pygospio elegans	11	5		60					214 ind.Pygospio elegans	10
61 ind.Pygospio elegans	1	0	1		Max	11		297 ind.Pygospio elegans	14	24		61					215 ind.Pygospio elegans	10
62 ind.Pygospio elegans	0	1	1		Min	1		298 ind.Pygospio elegans	13	13		62					216 ind.Pygospio elegans	10
63 ind.Pygospio elegans	0	0	0		Mode	1		299 ind.Pygospio elegans	9	4		63					218 ind.Pygospio elegans	10
64 ind.Pygospio elegans	0	0	0		Average	3.36207		300 ind.Pygospio elegans	23	18		64					225 ind.Pygospio elegans	2
65 ind.Pygospio elegans	1	0	1		n	60		301 ind.Pygospio elegans	13	11		65					236 ind.Pygospio elegans	4
66 ind.Pygospio elegans	0	0	0					302 ind.Pygospio elegans	9	6		66					241 ind.Pygospio elegans	18
67 ind.Pygospio elegans	0	0	0					Max	50	150							244 ind.Pygospio elegans	6
68 ind.Pygospio elegans	1	0	1					Min	1	1							247 ind.Pygospio elegans	6
69 ind.Pygospio elegans	1	1	2					Mode	1	1							248 ind.Pygospio elegans	3
70 ind.Pygospio elegans	1	1	2					Average	7.93939	12.4394							251 ind.Pygospio elegans	3
71 ind.Pygospio elegans	0	0	0					n	66								252 ind.Pygospio elegans	5
72 ind.Pygospio elegans	1	0	1														253 ind.Pygospio elegans	2
73 ind.Pygospio elegans	1	0	1														254 ind.Pygospio elegans	9
74 ind.Pygospio elegans	0	0	0														255 ind.Pygospio elegans	8
75 ind.Pygospio elegans	0	1	1														257 ind.Pygospio elegans	2
76 ind.Pygospio elegans	0	0	0														258 ind.Pygospio elegans	4
77 ind.Pygospio elegans	0	0	0														259 ind.Pygospio elegans	6
78 ind.Pygospio elegans	0	0	0														260 ind.Pygospio elegans	3
79 ind.Pygospio elegans	1	0	1														261 ind.Pygospio elegans	1
80 ind.Pygospio elegans	0	0	0														262 ind.Pygospio elegans	5
81 ind.Pygospio elegans	0	0	0														264 ind.Pygospio elegans	5
82 ind.Pygospio elegans	0	0	0														265 ind.Pygospio elegans	6
83 ind.Pygospio elegans	0	0	0														266 ind.Pygospio elegans	3
84 ind.Pygospio elegans	0	0	0														268 ind.Pygospio elegans	6
85 ind.Pygospio elegans	1	0	1														269 ind.Pygospio elegans	2
86 ind.Pygospio elegans	0	0	0														271 ind.Pygospio elegans	2
87 ind.Pygospio elegans	0	0	0														272 ind.Pygospio elegans	1
88 ind.Pygospio elegans	1	0	1														275 ind.Pygospio elegans	1
89 ind.Pygospio elegans	1	0	1														276 ind.Pygospio elegans	5
90 ind.Pygospio elegans	0	0	0														277 ind.Pygospio elegans	14
91 ind.Pygospio elegans	1	0	1														279 ind.Pygospio elegans	15
92 ind.Pygospio elegans	1	1	2														285 ind.Pygospio elegans	3
93 ind.Pygospio elegans	1	0	1														286 ind.Pygospio elegans	4
94 ind.Pygospio elegans	0	0	0														287 ind.Pygospio elegans	4
95 ind.Pygospio elegans	1	0	1														288 ind.Pygospio elegans	2
96 ind.Pygospio elegans	0	0	0														289 ind.Pygospio elegans	100
97 ind.Pygospio elegans	0	0	0														290 ind.Pygospio elegans	9
98 ind.Pygospio elegans	0	0	0														291 ind.Pygospio elegans	4
99 ind.Pygospio elegans	1	0	1														292 ind.Pygospio elegans	9
100 ind.Pygospio elegans	1	0	1														293 ind.Pygospio elegans	4
101 ind.Pygospio elegans	1	0	1														294 ind.Pygospio elegans	7
102 ind.Pygospio elegans	0	0	0														295 ind.Pygospio elegans	13
103 ind.Pygospio elegans	1	0	1														296 ind.Pygospio elegans	5
104 ind.Pygospio elegans	0	0	0														297 ind.Pygospio elegans	24
105 ind.Pygospio elegans	0	0	0														298 ind.Pygospio elegans	13
106 ind.Pygospio elegans	0	0	0														299 ind.Pygospio elegans	4
107 ind.Pygospio elegans	0	0	0														300 ind.Pygospio elegans	18
108 ind.Pygospio elegans	1	0	1														301 ind.Pygospio elegans	11
109 ind.Pygospio elegans	0	0	0														302 ind.Pygospio elegans	6
110 ind.Pygospio elegans	1	1	2														Max	150
111 ind.Pygospio elegans	0	0	0														Min	1
112 ind.Pygospio elegans	0	0	0														Mode	1
113 ind.Pygospio elegans	0	0	0														Average	9.77982
114 ind.Pygospio elegans	0	0	0														n	109
115 ind.Pygospio elegans	1	0	1
116 ind.Pygospio elegans	0	1	1
117 ind.Pygospio elegans	0	0	0
118 ind.Pygospio elegans	0	0	0
119 ind.Pygospio elegans	1	0	1
120 ind.Pygospio elegans	0	0	0
121 ind.Pygospio elegans	0	0	0
122 ind.Pygospio elegans	0	0	0
123 ind.Pygospio elegans	1	1	2
124 ind.Pygospio elegans	1	0	1
125 ind.Pygospio elegans	0	0	0
126 ind.Pygospio elegans	1	0	1
127 ind.Pygospio elegans	1	0	1
128 ind.Pygospio elegans	0	1	1
129 ind.Pygospio elegans	1	1	2
130 ind.Pygospio elegans	1	1	2
131 ind.Pygospio elegans	1	0	1
132 ind.Pygospio elegans	1	1	2
133 ind.Pygospio elegans	1	0	1
134 ind.Pygospio elegans	1	0	1
135 ind.Pygospio elegans	0	0	0
136 ind.Pygospio elegans	0	0	0
137 ind.Pygospio elegans	1	0	1
138 ind.Pygospio elegans	0	1	1
139 ind.Pygospio elegans	1	0	1
140 ind.Pygospio elegans	1	0	1
141 ind.Pygospio elegans	0	0	0
142 ind.Pygospio elegans	1	0	1
143 ind.Pygospio elegans	0	0	0
144 ind.Pygospio elegans	1	0	1
145 ind.Pygospio elegans	0	0	0
146 ind.Pygospio elegans	1	0	1
147 ind.Pygospio elegans	1	1	2
148 ind.Pygospio elegans	0	0	0
149 ind.Pygospio elegans	0	0	0
150 ind.Pygospio elegans	1	0	1
151 ind.Pygospio elegans	1	0	1
152 ind.Pygospio elegans	0	1	1
153 ind.Pygospio elegans	1	0	1
154 ind.Pygospio elegans	0	1	1
155 ind.Pygospio elegans	0	0	0
156 ind.Pygospio elegans	1	0	1
157 ind.Pygospio elegans	0	0	0
158 ind.Pygospio elegans	0	0	0
159 ind.Pygospio elegans	0	0	0
160 ind.Pygospio elegans	0	0	0
161 ind.Pygospio elegans	0	1	1
162 ind.Pygospio elegans	0	0	0
163 ind.Pygospio elegans	0	0	0
164 ind.Pygospio elegans	0	1	1
165 ind.Pygospio elegans	0	0	0
166 ind.Pygospio elegans	0	0	0
167 ind.Pygospio elegans	0	0	0
168 ind.Pygospio elegans	0	0	0
169 ind.Pygospio elegans	0	0	0
170 ind.Pygospio elegans	0	0	0
171 ind.Pygospio elegans	0	1	1
172 ind.Pygospio elegans	0	0	0
173 ind.Pygospio elegans	0	0	0
174 ind.Pygospio elegans	0	0	0
175 ind.Pygospio elegans	0	1	1
176 ind.Pygospio elegans	0	1	1
177 ind.Pygospio elegans	0	0	0
178 ind.Pygospio elegans	0	0	0
179 ind.Pygospio elegans	0	0	0
180 ind.Pygospio elegans	0	0	0
181 ind.Pygospio elegans	0	1	1
182 ind.Pygospio elegans	0	0	0
183 ind.Pygospio elegans	0	0	0
184 ind.Pygospio elegans	0	0	0
185 ind.Pygospio elegans	0	0	0
186 ind.Pygospio elegans	0	1	1
187 ind.Pygospio elegans	0	1	1
188 ind.Pygospio elegans	0	0	0
189 ind.Pygospio elegans	0	0	0
190 ind.Pygospio elegans	0	0	0
191 ind.Pygospio elegans	0	0	0
192 ind.Pygospio elegans	0	0	0
193 ind.Pygospio elegans	0	0	0
194 ind.Pygospio elegans	0	0	0
195 ind.Pygospio elegans	0	0	0
196 ind.Pygospio elegans	0	1	1
197 ind.Pygospio elegans	0	0	0
198 ind.Pygospio elegans	0	1	1
199 ind.Pygospio elegans	0	0	0
200 ind.Pygospio elegans	0	0	0
201 ind.Pygospio elegans	1	1	2
202 ind.Pygospio elegans	0	0	0
203 ind.Pygospio elegans	1	1	2
204 ind.Pygospio elegans	1	1	2
205 ind.Pygospio elegans	1	1	2
206 ind.Pygospio elegans	1	1	2
207 ind.Pygospio elegans	0	1	1
208 ind.Pygospio elegans	0	1	1
209 ind.Pygospio elegans	0	1	1
210 ind.Pygospio elegans	1	1	2
211 ind.Pygospio elegans	1	1	2
212 ind.Pygospio elegans	1	1	2
213 ind.Pygospio elegans	1	1	2
214 ind.Pygospio elegans	0	1	1
215 ind.Pygospio elegans	0	1	1
216 ind.Pygospio elegans	0	1	1
217 ind.Pygospio elegans	0	0	0
218 ind.Pygospio elegans	1	1	2
219 ind.Pygospio elegans	0	0	0
220 ind.Pygospio elegans	0	0	0
221 ind.Pygospio elegans	0	0	0
222 ind.Pygospio elegans	0	0	0
223 ind.Pygospio elegans	0	0	0
224 ind.Pygospio elegans	0	0	0
225 ind.Pygospio elegans	0	1	1
226 ind.Pygospio elegans	0	0	0
227 ind.Pygospio elegans	0	0	0
228 ind.Pygospio elegans	0	0	0
229 ind.Pygospio elegans	0	0	0
230 ind.Pygospio elegans	0	0	0
231 ind.Pygospio elegans	0	0	0
232 ind.Pygospio elegans	0	0	0
233 ind.Pygospio elegans	0	0	0
234 ind.Pygospio elegans	0	0	0
235 ind.Pygospio elegans	0	0	0
236 ind.Pygospio elegans	0	1	1
237 ind.Pygospio elegans	0	0	0
238 ind.Pygospio elegans	0	0	0
239 ind.Pygospio elegans	0	0	0
240 ind.Pygospio elegans	1	0	1
241 ind.Pygospio elegans	0	1	1
242 ind.Pygospio elegans	0	0	0
243 ind.Pygospio elegans	0	0	0
244 ind.Pygospio elegans	1	1	2
245 ind.Pygospio elegans	0	0	0
246 ind.Pygospio elegans	0	0	0
247 ind.Pygospio elegans	0	1	1
248 ind.Pygospio elegans	0	1	1
249 ind.Pygospio elegans	0	0	0
250 ind.Pygospio elegans	0	0	0
251 ind.Pygospio elegans	0	1	1
252 ind.Pygospio elegans	1	1	2
253 ind.Pygospio elegans	1	1	2
254 ind.Pygospio elegans	1	1	2
255 ind.Pygospio elegans	1	1	2
256 ind.Pygospio elegans	1	0	1
257 ind.Pygospio elegans	1	1	2
258 ind.Pygospio elegans	0	1	1
259 ind.Pygospio elegans	0	1	1
260 ind.Pygospio elegans	1	1	2
261 ind.Pygospio elegans	0	1	1
262 ind.Pygospio elegans	1	1	2
263 ind.Pygospio elegans	0	0	0
264 ind.Pygospio elegans	0	1	1
265 ind.Pygospio elegans	0	1	1
266 ind.Pygospio elegans	1	1	2
267 ind.Pygospio elegans	0	0	0
268 ind.Pygospio elegans	1	1	2
269 ind.Pygospio elegans	0	1	1
270 ind.Pygospio elegans	0	0	0
271 ind.Pygospio elegans	1	1	2
272 ind.Pygospio elegans	0	1	1
273 ind.Pygospio elegans	1	0	1
274 ind.Pygospio elegans	1	0	1
275 ind.Pygospio elegans	1	1	2
276 ind.Pygospio elegans	1	1	2
277 ind.Pygospio elegans	1	1	2
278 ind.Pygospio elegans	1	0	1
279 ind.Pygospio elegans	1	1	2
280 ind.Pygospio elegans	1	0	1
281 ind.Pygospio elegans	0	0	0
282 ind.Pygospio elegans	1	0	1
283 ind.Pygospio elegans	0	0	0
284 ind.Pygospio elegans	1	0	1
285 ind.Pygospio elegans	1	1	2
286 ind.Pygospio elegans	1	1	2
287 ind.Pygospio elegans	1	1	2
288 ind.Pygospio elegans	1	1	2
289 ind.Pygospio elegans	1	1	2
290 ind.Pygospio elegans	1	1	2
291 ind.Pygospio elegans	1	1	2
292 ind.Pygospio elegans	1	1	2
293 ind.Pygospio elegans	1	1	2
294 ind.Pygospio elegans	1	1	2
295 ind.Pygospio elegans	1	1	2
296 ind.Pygospio elegans	1	1	2
297 ind.Pygospio elegans	1	1	2
298 ind.Pygospio elegans	1	1	2
299 ind.Pygospio elegans	1	1	2
300 ind.Pygospio elegans	1	1	2
301 ind.Pygospio elegans	1	1	2
302 ind.Pygospio elegans	1	1	2
n	126	109	66
	P.pygospionis	S.pygospionis	Co-infection

## Sheet: P. cf. spionis
Resin blocks and fixed slides containing eugregarines and pieces of infected host intestine deposited in the collection of the Department of Invertebrate Zoology, St Petersburg State University (accession numbers 742-743 in the section "Polyrhabdina cf. spionis").
Gamonts+trophozoites / preparations
	Length, mkm	Width, mkm	Length of collar, mkm	Length of epimerite, mkm	Base of epimerite, mkm	Number of crests in H	mkm	Number of crests in 1 mkm
	60.6061	20.6061
	54.5455	18.4848
	53.75	15.5
	53.75	15.5
	60	19		3.33333	4.33333
				2.33333	4.66667
	60	18
				2.42424	4.84848
	58.4615	15.3846		3.69231	3.69231	46	9.23077	4.98333
						35	8.88889	3.9375
	37.8947	11.5789				32	5.26316	6.08
			1.48649		4.45946
	61.3333	22.2667				16	4	4
			0.208333		3.95833
	57.8947	21.0526
	56.1404	19.2982
	42.1053	15.7895
	47.9452	15.6164				27	6.84932	3.942
						25	4	6.25
	57.6271	16.9492
	61.0169	18.6441
	64.4068	18.9831
				3.4717	4.33962
			1.38462		4.30769
			1.68831		4.41558
	62.8846	19.2308
	59.0164	18.0328
	58.3333	16.0417
	57.8947	18.4211
	54.386	15.7895				21	5.26316	3.99
	49.1228	11.7544
				3.78378	4.05405
	43.7333	10.6667
	30	10.4286				22	4.28571	5.13333
	43.2692	17.3077				20	5.76923	3.46667
	37.5	16.3462				23	5.76923	3.98667
						16	3.15789	5.06667
						24	7.14286	3.36
						19	3.7037	5.13
						20	5.26316	3.8
						16	9.61538	1.664
Average	53.2161	16.7951	1.19194	3.17312	4.30755	24.1333	5.88016	4.31934
Min	30	10.4286	0.208333	2.33333	3.69231	16	3.15789	1.664
Max	64.4068	22.2667	1.68831	3.78378	4.84848	46	9.61538	6.25
SEM	7.24292	2.39578	0.491802	0.529552	0.243593	5.91111	1.64352	0.896969
SD	7.24292	2.39578	0.491802	0.529552	0.243593	5.91111	1.64352	0.896969
n	26	26	4	6	10	15	15	15

## Sheet: Infection rate of P.cf.spionis
NN hosts (Malacoceros fuliginosus)	Polyrhabdina cf. spionis, 1 - yes, 0 - no	Cells per host
1 ind.Malacoceros fuliginosus	1	several (1-5)
2 ind.Malacoceros fuliginosus	1	several (1-5)
3 ind.Malacoceros fuliginosus	1	about 50
4 ind.Malacoceros fuliginosus	0
5 ind.Malacoceros fuliginosus	0
6 ind.Malacoceros fuliginosus	0
7 ind.Malacoceros fuliginosus	0
8 ind.Malacoceros fuliginosus	0
9 ind.Malacoceros fuliginosus	0
10 ind.Malacoceros fuliginosus	0
11 ind.Malacoceros fuliginosus	0
12 ind.Malacoceros fuliginosus	0
13 ind.Malacoceros fuliginosus	0
14 ind.Malacoceros fuliginosus	0
15 ind.Malacoceros fuliginosus	0
16 ind.Malacoceros fuliginosus	0
17 ind.Malacoceros fuliginosus	0
18 ind.Malacoceros fuliginosus	0
n	3
